1 Social determinants of health, the family, and children's personal hygiene: a comparative study.

2

3 Antonio Jesús Ramos-Morcillo<sup>1¶</sup>, Francisco José Moreno-Martínez<sup>2\*¶</sup>, Ana María Hernández-

4 Susarte<sup>2¶</sup>, María Ruzafa-Martínez<sup>1¶</sup>.

5

6 <sup>1</sup> Nursing Department, Faculty of Nursing, University of Murcia. Murcia. Spain

7 <sup>2</sup> Murcian Institute of Social Action. El Palmar. Murcia. Spain

8

9 \* Corresponding author

10 E-mail: frandocfisio@hotmail.com (FJMM)

11

12 ¶ These authors contributed equally to this work

13

14

15

16

17

18

19

20

21

22

23

## 24 **Abstract**

### 25 Aims

26 To examine differences in personal hygiene and in the perception of social rejection between  
27 children in reception centers and children living in a family setting.

### 28 Background

29 Little attention has been paid to the influence of the family as a unit on the personal hygiene  
30 behaviors of children.

### 31 Design

32 Cross-sectional study.

### 33 Methods

34 Children aged between 7-12 years were recruited from 2015 through 2017 from two centers in  
35 the Network of State Care Centers and from three schools selected from a rural, suburban and  
36 urban setting in the same region. A validated questionnaire on child personal hygiene habits  
37 was completed by 51 children in reception centers and 454 in normal families.

### 38 Results

39 Data shows worse results for the majority personal hygiene habits studied in children in  
40 reception centers than in children living in families. Multiple logistic regressions showed lower  
41 frequency of body washing, hand washing after defecating, use of soap in hand washing, tooth  
42 brushing, and dentist visits during the previous year. Also, a significantly higher proportion of  
43 children in reception centers had experienced social rejection for being dirty and smelling bad  
44 in comparison to the children living in families.

### 45 Conclusions

46 Deficient hygiene habits were observed in the offspring of families affected by the main  
47 features of social inequality, who were more likely to perceive social rejection for this reason  
48 and less likely to consider their family as the greatest influence on their personal hygiene

49 practices. Promoting family practices designed to improve personal hygiene habits are needed  
50 specially in vulnerable families.

51

## 52 **Introduction**

53 Inequalities in health and wellbeing among social groups have been largely attributed  
54 to social determinants of health (SDHs), which are considered at least as important as biological  
55 mechanisms for disease prevention and treatment [1]. SDHs include socioeconomic and  
56 political settings and the particular socioeconomic status of individuals; intermediate  
57 determinants of SDHs include material resources, psychosocial, behavioral, and biological  
58 factors, and healthcare systems [1].

59 Multilevel ecological models of SDHs include the family within the “social, family,  
60 and community networks” domain, considered not only as a source of support and sustenance  
61 but also as an educational resource for the acquisition of healthy habits. Negative aspects are  
62 also recognized, with family conflict being a possible risk factor [2]. The family is the first and  
63 most important influence on the health and development of children and on the shaping of their  
64 routines, habits, attitudes, and social behaviors, including personal hygiene habits [3–5]

## 65 **Background**

66 Improvements in sanitary conditions and the acquisition of certain personal hygiene  
67 practices during childhood have played a decisive role in reducing infant mortality and  
68 increasing life expectancy [6]. However, diseases related to poor hygiene (e.g., diarrhea or  
69 respiratory infections) still kill millions of infants in countries with the greatest social  
70 inequalities [7–9]. Inadequate hygiene practices have also been implicated in infant morbidity  
71 in developed countries, including infectious and parasitic diseases, pneumonia [8], otitis,  
72 mycosis, diarrhea, dental caries, gingivitis, and pediculosis [10,11]. Poor hygiene can also be  
73 a cause of social rejection, especially for children from poorer families [12].

74 An inadequate family income is considered as a primary cause of poor health in  
75 children [13,14], but the role of the family as social determinant has not been sufficiently  
76 considered, although SDH-related factors are known to affect the capacity of families to care  
77 for their children [15]. However, researchers have often analyzed the family in a fragmented  
78 manner rather than as a unit. For instance, it has been investigated whether the wealth of  
79 families and relationships with parents predict healthy behaviors in young people [16] or  
80 whether parental educational level is associated with personal hygiene habits [17].

81 Over recent years, the risk of family poverty has been increased by economic  
82 recession, family breakups, and migration, among other factors [18]. Economic inequalities  
83 and the lack of effective social policies have also affected the most vulnerable, generating  
84 unstructured and dysfunctional families [19]. In extreme cases, such as abuse or abandonment,  
85 the state can move children into reception centers for their protection and safety [20]. Children  
86 in reception centers (CRCs) have been described as invisible [21], and there has been little  
87 research on their health-related lifestyles.

88 Analysis of the influence of the family as SDH involves the identification of health or  
89 healthcare disparity between vulnerable and less-vulnerable populations [22]. The aim of this  
90 study was to determine whether CRCs and children living in families (CLFs) differ in their  
91 personal hygiene habits and learning and in their perception of social rejection.

## 92 **Material and methods**

93 An observational, cross-sectional study compared a group of CRCs with a group of  
94 CLFs was carried out.

## 95 **Setting and Participants**

96 Children aged between 7 and 12 yrs were studied from March 2015 through January  
97 2017. CRCs were recruited from two centers in the Network of State Care Centers (first stage  
98 in fostering process). CLFs were recruited from three schools selected by convenience from a

99 rural (<30,000 inhabitants), suburban (30,000 – 50,000 inhabitants), and urban (>50,000  
100 inhabitants) setting in the same region.

101 The eligible population was all children in the selected schools and reception centers  
102 who met the following inclusion criteria: age between 7 and 12 yrs, voluntary participation,  
103 and written consent to participation from parents or legal guardians. Exclusion criteria were  
104 inability to speak Spanish or the presence of physical/psychological disabilities that hindered  
105 participation. CRCs who had previously been admitted to care were also excluded to avoid the  
106 influence of hygiene habits acquired during earlier admission(s).

## 107 **Data collection**

### 108 **Parents/guardians questionnaire**

109 A questionnaire was administered to parents/guardians of the CLFs to gather data on  
110 their educational level, current occupation, type of employment, and household monthly  
111 income. CLFs were divided into three groups according to this income:  $\leq 1,000$  €, 1,001 -  
112 2,000€, and  $> 2,000$  €. Information was also collected on the sex, age, and nationality of the  
113 children, the nationality of the parents, number of siblings, and days of school attendance per  
114 week.

### 115 **Children Personal Hygiene Questionnaire (HICORIN®)**

116 Children data were gathered using the HICORIN® questionnaire, which includes 63  
117 items divided among seven personal hygiene dimensions and hygiene-related social aspects.  
118 For this study, we selected items related to the frequency, manner, and timing of personal  
119 hygiene activities and the materials used, considering the following dimensions: body skin (8  
120 items), hair (2 items), hands (5 items), oral (14 items); agents affecting personal hygiene  
121 learning (8 items); social rejection (2 items); and motivation for personal hygiene activities (5  
122 items).

123 The HICORIN® questionnaire was interviewer-administered for children aged 7-10 yrs  
124 and self-administered for those aged 11-12 yrs. It was completed by participating CLFs at  
125 school one week after consent to participation was obtained from parents/guardians and by  
126 participating CRCs within two days of admission to the care center. Economic data for the  
127 parents/guardians of CRCs were gathered from the computer records of the protection centers.

## 128 **Ethical considerations**

129 The study was approved by the Research Ethics Committee of the University of  
130 Murcia (22012014). Written authorization for the children's participation was obtained from  
131 parents/guardians in the case of CLFs and from the General Directorate of Social Policy of  
132 Murcia Autonomous Community in the case of CRCs.

## 133 **Data analysis**

134 Exploratory analysis was carried out to evaluate missing data and questionnaires with  
135 missing items were eliminated. In a descriptive analysis, we calculated absolute and relative  
136 frequencies for qualitative variables and means with standard deviation (SD) for quantitative  
137 variables. We used the chi-square test to assess differences in the personal hygiene habits  
138 between CRCs and CLFs, stratifying CLFs families into three income levels. We performed  
139 multivariate binomial logistic regression analysis to compare the prevalence of hygiene habits  
140 between CRCs and CLFs, calculating crude odds ratios (ORs) and ORs adjusted for sex and  
141 age with 95 % confidence interval (95% CI). IBM SPSS 21.0 (IBM SPSS, Chicago, IL, USA)  
142 was used for the data analysis, considering  $p < 0.05$  to be statistically significant.

## 143 **Validity, Reliability and Rigour**

144 HICORIN® questionnaire has been validated for Spanish populations and can be used  
145 in healthy children to prevent diseases that might not happen (Moreno-Martínez, Ruzafa-  
146 Martínez, Ramos-Morcillo, Gómez García, & Hernández-Susarte, 2015). It has demonstrated

147 adequate reliability; the results of the test-retest coefficient were between very good and  
 148 moderate in 84.1% of the items. Likewise, content validation, pilot study and items response  
 149 analysis confirmed satisfactory validity.

150

## 151 **Results**

152 Study eligibility criteria were met by 51 out of the 563 children admitted to the two  
 153 reception centers during the study period, and all completed the questionnaire (100% response  
 154 rate). These criteria were met by 758 CLFs in the three schools, and 404 of them completed  
 155 the questionnaire (53.29% response rate).

### 156 **Sociodemographic characteristics of families and children**

157 Comparison of the characteristics of the families of the four study groups (CRCs and  
 158 three groups of CLFs by monthly household income) revealed significant differences in all  
 159 study variables (Table 1). In families of CRCs, 90.2% (n=46) of parents had no or only primary  
 160 schooling, 48% (n=24) were employed (50% of these in unskilled work), and 88.2% (45) of  
 161 the families had a monthly household income  $\leq$  1,000€. A significantly higher percentage of  
 162 CRCs (21 %, n=11) were immigrants in comparison to the three groups of CLFs, 41.2% (n=21)  
 163 had immigrant mothers and 33% (n=17) had immigrant fathers, 70.6% (n=36) had  $\geq$ 3 siblings,  
 164 and 31.4% (n=16) reported not going to school every day.

165 **Table 1. Comparison of family socioeconomic variables between children in residential**  
 166 **care and those living with their family according to its monthly income (N=455)**

| Family socioeconomic variables |                                                                                | CRC<br>n=51 | CLF<br>Income<br>$\leq$ 1000€<br>n=82 | CLF Income<br>1001€-2000€<br>n=97 | CLF Income<br>>2000€<br>n=225 |
|--------------------------------|--------------------------------------------------------------------------------|-------------|---------------------------------------|-----------------------------------|-------------------------------|
| Parents Educational level***   |                                                                                |             |                                       |                                   |                               |
|                                | No or primary studies<br>n(%)                                                  | 46(90.2)    | 37(45.7)                              | 18(17.6)                          | 0(0.0)                        |
|                                | First stage of secondary<br>schooling or mid-level<br>vocational training n(%) | 3(5.9)      | 8(9.9)                                | 9(8.8)                            | 4(1.8)                        |

|                               |                                                                                  |          |          |          |           |
|-------------------------------|----------------------------------------------------------------------------------|----------|----------|----------|-----------|
|                               | Second stage of secondary education or higher-level vocational training n(%)     | 2(3.9)   | 27(33.3) | 34(33.3) | 16(7.1)   |
|                               | University studies n(%)                                                          | 0(0.0)   | 9(11.1)  | 41(40.2) | 204(91.1) |
| Parents Current occupation*** |                                                                                  |          |          |          |           |
|                               | Student, exclusive dedication n(%)                                               | 0(0.0)   | 4(4.8)   | 0(0.0)   | 0(0.0)    |
|                               | Self-employed n(%)                                                               | 2(4.0)   | 7(8.4)   | 14(13.7) | 54(24.1)  |
|                               | Employed n(%)                                                                    | 20(40.0) | 34(41.0) | 54(52.9) | 143(63.8) |
|                               | Retired n(%)                                                                     | 0(0.0)   | 0(0.0)   | 1(1.0)   | 2(0.9)    |
|                               | Unemployed n(%)                                                                  | 26(52.0) | 36(43.4) | 27(26.5) | 21(9.4)   |
|                               | Other n(%)                                                                       | 2(4.0)   | 2(2.4)   | 6(5.9)   | 4(1.8)    |
| Type of employment***         |                                                                                  |          |          |          |           |
|                               | Manager/director in public administration or and companies with ≥10 workers n(%) | 0(0.0)   | 0(0.0)   | 3(4.3)   | 93(47.2)  |
|                               | Manager in companies with <10 workers n(%)                                       | 0(0.0)   | 0(0.0)   | 9(13.0)  | 30(15.2)  |
|                               | Administrative workers. Personnel services & safety n(%)                         | 2(9.1)   | 7(17.9)  | 23(33.3) | 44(22.3)  |
|                               | Self-employed n(%)                                                               | 1(4.5)   | 9(23.1)  | 14(20.3) | 24(12.2)  |
|                               | Supervisors of manual workers n(%)                                               | 0(0.0)   | 0(0.0)   | 1(1.4)   | 0(0.0)    |
|                               | Qualified and semi-qualified manual workers n(%)                                 | 8(36.4)  | 14(35.9) | 15(21.7) | 5(2.5)    |
|                               | Unqualified workers n(%)                                                         | 11(50.0) | 9(23.1)  | 4(5.8)   | 1(0.5)    |
| Children Sex                  | Male n(%)                                                                        | 24(47.1) | 39(46.4) | 47(47.5) | 122(54.2) |
|                               | Female n(%)                                                                      | 27(52.9) | 45(53.6) | 52(52.5) | 103(45.8) |
| Children Age*                 | 7-8 yrs n(%)                                                                     | 13(26.0) | 30(35.7) | 37(36.6) | 92(40.9)  |
|                               | 9-10 yrs n(%)                                                                    | 15(30.0) | 36(42.9) | 43(42.6) | 83(36.9)  |
|                               | 11-12 yrs n(%)                                                                   | 22(44.0) | 18(21.4) | 21(20.8) | 50(22.2)  |
| Children Place of birth **    | Spain n(%)                                                                       | 40(78.4) | 72(84.7) | 99(97.1) | 221(98.2) |
|                               | Another country n(%)                                                             | 11(21.6) | 10(11.8) | 2(2.0)   | 4(1.8)    |
|                               | Unknown n(%)                                                                     | 0(0.0)   | 3(3.5)   | 1(1.0)   | 0(0.0)    |
| Place of birth of mother**    | Spain n(%)                                                                       | 30(58.8) | 59(70.2) | 94(92.2) | 213(94.7) |
|                               | Another country n(%)                                                             | 21(41.2) | 19(22.6) | 5(4.9)   | 7(3.1)    |
|                               | Unknown n(%)                                                                     | 0(0.0)   | 6(7.1)   | 3(2.9)   | 5(2.2)    |
| Place of birth of father**    | Spain n(%)                                                                       | 33(64.7) | 59(71.1) | 91(89.2) | 211(93.8) |
|                               | Another country n(%)                                                             | 17(33.3) | 19(22.9) | 7(6.9)   | 4(1.8)    |
|                               | Unknown n(%)                                                                     | 1(2.0)   | 5(6.0)   | 4(3.9)   | 10(4.4)   |
| Number of siblings**          | None n(%)                                                                        | 2(3.9)   | 6(7.1)   | 6(5.9)   | 13(5.8)   |
|                               | 1 or 2 n(%)                                                                      | 13(25.5) | 65(76.5) | 82(80.4) | 188(83.6) |
|                               | 3 or more n(%)                                                                   | 36(70.6) | 14(16.5) | 14(13.7) | 24(10.7)  |
| School attendance **          | Always n(%)                                                                      | 35(68.6) | 82(98.8) | 101(100) | 224(99.6) |
|                               | 3 or 4 days a week n(%)                                                          | 5(9.8)   | 1(1.2)   | 0(0.0)   | 0(0.0)    |
|                               | 1 or 2 days a week n(%)                                                          | 4(7.8)   | 0(0.0)   | 0(0.0)   | 1(0.4)    |
|                               | Never n(%)                                                                       | 7(13.7)  | 0(0.0)   | 0(0.0)   | 0(0.0)    |

167 CRC: Children in residential care; CLF: children living in a family

168 \*p<0.05; \*\*p=0.001; \*\*\* p<0.0001



## 169 Personal hygiene habits

170 Tables 2 exhibits the results for body and hair hygiene habits. Statistically significant  
 171 differences were found between CRCs and CLFs in almost all items. The frequency of body  
 172 washing “ $\geq 3$  days a week” was 12- to 15-fold lower in CRCs than in CLFs; a wet towel/sponge  
 173 was used for body washing by 23.5% (n=12) of CRCs *versus* almost 100% of CLFs who  
 174 reported taking a shower/bath; and body washing was performed at night (before bedtime) by  
 175 39.2% (n=20) of CRCs *versus* <50 % of CLFs. With regard to materials, gels were not used or  
 176 known by 21.6% (n=11) of CRCs *versus* 3.6-7.1% of CLFs, the use of bars of soap was  
 177 uncommon but was more frequent by CRCs than by CLFs (n=17). A washbowl was more often  
 178 used in body washing by CRCs than by CLFs, whose use of this complement was less frequent  
 179 with higher household income. A hair washing frequency of “ $\geq 3$  times/week” was 8.6-9.5-fold  
 180 lower in CRCs than in the CLF groups. The frequency of shampoo use did not significantly  
 181 differ between CRCs and CLFs (p=0.364).

182 **Table 2. Comparison of body/hair and hand hygiene variables between children in residential care and**  
 183 **those living with their family according to its monthly income (N=455)**

| Body washing         |                    | CRC<br>n=51 | CLF Income<br>$\leq 1,000$ €<br>n=82 | CLF Income<br>1,001 €-2,000 €<br>n=97 | CLF Income<br>>2,000 €<br>n=225 |
|----------------------|--------------------|-------------|--------------------------------------|---------------------------------------|---------------------------------|
| Weekly frequency***  | $\geq 3$ days n(%) | 26 (51.0)   | 76 (89.4)                            | 93 (92.1)                             | 200 (90.5)                      |
|                      | $\leq 2$ days n(%) | 25 (49.0)   | 9 (10.6)                             | 8 (7.9)                               | 21 (9.5)                        |
|                      | OR (95 % CI)***    | 1           | 8.1 (3.3-19.6)                       | 11.1 (4.5-27.6)                       | 9.1 (4.5-18.6)                  |
|                      | ORa (95 % CI)***   | 1           | 12.0 (4.6-31.3)                      | 15.2 (5.7-40.0)                       | 14.1 (6.3-31.4)                 |
| Manner of washing*** | Shower/Bath n(%)   | 39 (76.5)   | 83 (98.8)                            | 99 (99.0)                             | 225 (100.0)                     |
|                      | Towel/sponge n(%)  | 12 (23.5)   | 1 (1.2)                              | 1 (1.0)                               | 0 (0.0)                         |
|                      | OR (95 % CI)***    | 1           | 25.5 (3.2-203.4)                     | 30.4 (3.8-242.2)                      | <sup>a</sup>                    |
|                      | ORa (95 % CI)***   | 1           | 33.2 (4.0-273.2)                     | <sup>a</sup>                          | <sup>a</sup>                    |
| Time of day          | Bedtime n(%)       | 20 (39.2)   | 38 (45.2)                            | 59 (57.8)                             | 125 (56.1)                      |
|                      | Other n(%)         | 31 (60.8)   | 46 (54.8)                            | 43 (42.2)                             | 98 (43.9)                       |
|                      | OR (95 % CI)       | 1           | 1.2 (0.6-2.5)                        | 2.1 (1.0-4.2)                         | 1.9 (1.0-3.6)                   |
|                      | ORa (95 % CI)      | 1           | 1.4 (0.6-2.9)                        | 2.2 (1.1-4.6)                         | 2.2 (1.1-4.2)                   |
| Use shower gel***    | Yes n(%)           | 40 (78.4)   | 79 (92.9)                            | 98 (96.1)                             | 217 (96.4)                      |
|                      | No/unknown n(%)    | 11 (21.6)   | 6 (7.1)                              | 4 (3.9)                               | 8 (3.6)                         |
|                      | OR (95 % CI)**     | 1           | 3.6 (1.2-10.5)                       | 6.7 (2.9-22.4)                        | 7.4 (2.8-19.7)                  |
|                      | ORa (95 % CI)***   | 1           | 4.6 (1.5-14.1)                       | 10.8 (2.8-42.1)                       | 10.2 (3.6-28.2)                 |
| Use sponge**         | No/unknown n(%)    | 15 (29.4)   | 14 (16.9)                            | 25 (24.8)                             | 84 (37.5)                       |
|                      | Yes n(%)           | 36 (70.6)   | 69 (83.1)                            | 76 (75.2)                             | 140 (62.5)                      |
|                      | OR (95 % CI)**     | 1           | 0.4 (0.2-1.1)                        | 0.7 (0.3-1.6)                         | 1.4 (0.7-2.7)                   |
|                      | ORa (95 % CI)**    | 1           | 0.4 (0.1-1.0)                        | 0.8 (0.3-1.7)                         | 1.3 (0.7-2.6)                   |
| Use bar of           | No/unknown n(%)    | 34 (66.7)   | 60 (74.1)                            | 84 (84.0)                             | 189 (85.5)                      |

|                                     |                  |           |                |                 |                 |
|-------------------------------------|------------------|-----------|----------------|-----------------|-----------------|
| soap**                              | Yes n(%)         | 17 (33.3) | 21 (25.9)      | 16 (16.0)       | 32 (14.5)       |
|                                     | OR (95 % CI)**   | 1         | 1.4 (0.6-3.0)  | 2.6 (1.1-5.7)   | 2.9 (1.4-5.9)   |
|                                     | ORa (95 % CI)**  | 1         | 1.3 (0.6-2.9)  | 2.7 (1.2-6.0)   | 2.9 (1.4-5.9)   |
| Use washbowl                        | No/unknown n(%)  | 38 (74.5) | 76 (90.5)      | 97 (96.0)       | 219 (98.2)      |
|                                     | Yes n(%)         | 13 (25.5) | 8 (9.5)        | 4 (4.0)         | 4 (1.8)         |
|                                     | OR (95 % CI)***  | 1         | 3.2 (1.2-8.5)  | 8.2 (2.5-27.0)  | 18.7 (5.7-60.4) |
|                                     | ORa (95 % CI)*** | 1         | 3.9 (1.4-10.7) | 12.8 (3.3-48.5) | 23.9 (7.1-79.9) |
| Weekly frequency of hair washing*** | ≥3 days n(%)     | 21 (41.2) | 68 (80.0)      | 81 (80.2)       | 177 (80.1)      |
|                                     | ≤2 days n(%)     | 30 (58.8) | 17 (20.0)      | 20 (19.8)       | 44 (19.9)       |
|                                     | OR (95 % CI)***  | 1         | 5.7 (2.6-12.3) | 5.7 (2.7-12.1)  | 5.7 (3.0-10.9)  |
|                                     | ORa (95 % CI)*** | 1         | 9.5 (4.0-22.4) | 8.6 (3.8-19.6)  | 9.4 (4.4-19.6)  |
| Use shampoo                         | Yes n(%)         | 48 (94.1) | 80 (96.4)      | 100 (98.0)      | 217 (98.2)      |
|                                     | No/unknown n(%)  | 3 (5.9)   | 3 (3.6)        | 2 (2.0)         | 4 (1.8)         |
|                                     | OR (95 % CI)     | 1         | 1.6 (0.3-8.5)  | 3.1 (0.5-19.3)  | 3.3 (0.7-15.6)  |
|                                     | ORa (95 % CI)    | 1         | 1.6 (0.3-8.9)  | 3.1 (0.4-19.4)  | 3.7 (0.7-17.7)  |

184 CRC: Children in residential care; CLF: children living on a family; OR: Odds Ratio; ORa: Odds Ratio adjusted  
 185 for age and sex; <sup>a</sup>OR calculation not applicable

186 \*p<0.05; \*\*p<0.01; \*\*\*p<0.001

187

188 As shown in Table 3 “hand washing ≥3times a day” was reported by a lower  
 189 percentage of CRCs than of CLFs, regardless of their household income, but the difference was  
 190 not statistically significant. The use of soap in hand washing was significantly less frequent  
 191 among CRCs (39.2%; 20) than among CLFs in the income group between 1,001 and 2,000€  
 192 (89.2%; 91). Statistically significant differences were also obtained in hand washing  
 193 frequencies, which were always lower for CRCs. Hand washing after defecating was the most  
 194 frequent practice in all study groups, although it was reported by a higher percentage of CLFs  
 195 than CRCs.

196 **Table 3. Comparison of hand hygiene variables between children in residential care and**  
 197 **those living with their family according to its monthly income (N=455)**

| Hand washing              |                | CRC<br>n=51 | CLF<br>Income ≤1,000 €<br>n=83 | CLF Income<br>1,001 €-2,000 €<br>n=97 | CLF<br>Income >2,000 €<br>n=224 |
|---------------------------|----------------|-------------|--------------------------------|---------------------------------------|---------------------------------|
| Daily frequency           | >3 times n(%)  | 13 (25.5)   | 31 (36.5)                      | 35 (35.0)                             | 80 (35.7%)                      |
|                           | ≤3 times n(%)  | 38 (74.5)   | 54 (63.5)                      | 65 (65.0)                             | 144 (64.3)                      |
|                           | OR (95 % CI)   | 1           | 1.6 (0.7-3.6)                  | 1.5 (0.7-3.3)                         | 1.6 (0.8-3.2)                   |
|                           | ORa (95 % CI)  | 1           | 2.0 (0.9-4.4)                  | 1.7 (0.8-3.8)                         | 1.9 (0.9-3.9)                   |
| Always before every meal* | Yes n(%)       | 5 (9.8)     | 47 (55.3)                      | 53 (52.0)                             | 116 (51.6)                      |
|                           | No n(%)        | 46 (90.2)   | 38 (44.7)                      | 49 (48.0)                             | 109 (48.4)                      |
|                           | OR (95 % CI)*  | 1           | 11.3 (4.1-31.4)                | 9.9 (3.6-27.0)                        | 9.7 (3.7-25.5)                  |
|                           | ORa (95 % CI)* | 1           | 12.0 (4.3-33.3)                | 9.9 (3.6-27.2)                        | 9.7 (3.7-25.5)                  |
| Always after              | Yes n(%)       | 16 (31.4)   | 60 (70.6)                      | 79 (77.5)                             | 172 (77.1)                      |

|                         |                |           |                 |                 |                 |
|-------------------------|----------------|-----------|-----------------|-----------------|-----------------|
| defecating*             | No n(%)        | 35 (68.6) | 25 (29.4)       | 23 (22.5)       | 51 (22.9)       |
|                         | OR (95 % CI)*  | 1         | 5.2 (2.4-11.1)  | 7.5 (3.5-15.9)  | 7.3 (3.7-14.4)  |
|                         | ORa (95 % CI)* | 1         | 9.5 (4.1-22.1)  | 11.2 (4.9-25.6) | 12.8 (6.0-27.5) |
| Always after urinating* | Yes n(%)       | 7 (13.7)  | 47 (55.3)       | 61 (59.8)       | 121 (53.8)      |
|                         | No n(%)        | 44 (86.3) | 38 (44.7)       | 41 (40.2)       | 104 (46.2)      |
|                         | OR (95 % CI)*  | 1         | 7.7 (3.1-19.2)  | 9.3 (3.8-22.7)  | 7.3 (3.1-16.9)  |
|                         | ORa (95 % CI)* | 1         | 10.6 (4.1-27.4) | 11.9 (4.7-30.2) | 10.1 (4.2-24.3) |
| Always use soap*        | Yes n(%)       | 20 (39.2) | 63 (74.1)       | 91 (89.2)       | 181 (80.4)      |
|                         | No n(%)        | 31 (60.8) | 22 (25.9)       | 11 (10.8)       | 44 (19.6)       |
|                         | OR (95 % CI)*  | 1         | 4.4 (2.1-9.3)   | 12.8 (5.5-29.7) | 6.3 (3.3-12.2)  |
|                         | ORa (95 % CI)* | 1         | 4.5 (2.1-9.6)   | 13.6 (5.7-32.3) | 6.3 (3.3-12.2)  |

198 CRC: children in residential care; CLF: Children living on a family; OR: Odds Ratio; ORa: Odds Ratio adjusted for age and  
199 sex

200 \*p<0.001

201

202 Statistically significant results were observed in all oral hygiene items (Table 4). The  
203 tooth brushing frequency “ $\geq 2$ times a day” was reported by a lower percentage of CRCs than  
204 of CLFs, and the percentage of CLFs increased with higher household incomes. The highest  
205 frequency of tooth brushing by all of the children was at night (before bedtime), although it  
206 was significantly less frequent in CRCs. With respect to the materials used for oral hygiene,  
207 toothbrush and toothpaste were the most frequently used (>80% in all groups). In addition,  
208 17.6% (9) of CRCs shared their toothbrush with other family members. There were also  
209 significant differences in the type of toothbrush used, with 6% of CRCs reporting the use of an  
210 electrical toothbrush *versus* 40% of CLFs. Conversely, utilization of a toothpick was reported  
211 by a higher percentage of CRCs than of CLFs (37.3%; 19). The frequency of dentist visits  
212 during the previous year was significantly lower in CRCs and was greater with higher  
213 household income in CLFs.

214 **Table 4. Comparison of oral hygiene variables between children in residential care and those living with**  
215 **their family according to its monthly income (N=456)**

| Oral hygiene                     |                     | CRC<br>n=51 | CFL<br>Income $\leq 1,000$ €<br>n=83 | CLF Income<br>1,001 €-2,000 €<br>n=98 | CLF<br>Income >2,000 €<br>n=224 |
|----------------------------------|---------------------|-------------|--------------------------------------|---------------------------------------|---------------------------------|
| Daily tooth brushing frequency** | $\geq 2$ times n(%) | 17 (33.3)   | 57 (67.1)                            | 75 (73.5)                             | 184 (82.1)                      |
|                                  | <2times n(%)        | 34 (66.7)   | 28 (32.9)                            | 27 (26.5)                             | 40 (17.9)                       |
|                                  | OR (95 % CI)**      | 1           | 4.0 (1.9-8.5)                        | 5.5 (2.6-11.5)                        | 9.2 (4.6-18.0)                  |

|                                        |                 |           |                  |                 |                  |
|----------------------------------------|-----------------|-----------|------------------|-----------------|------------------|
|                                        | ORa (95 % CI)** | 1         | 4.9 (2.2-10.6)   | 6.4 (2.9-13.7)  | 11.8 (5.7-24.3)  |
| Dentist visits during previous year**  | Yes n(%)        | 17 (34.0) | 68 (82.9)        | 90 (90.9)       | 203 (91.4)       |
|                                        | No n(%)         | 33 (66.0) | 14 (17.1)        | 9 (9.1)         | 19 (8.6)         |
|                                        | OR (95 % CI)**  | 1         | 9.4 (4.1-21.4)   | 19.4 (7.8-47.7) | 20.7 (9.7-43.9)  |
|                                        | ORa (95 % CI)** | 1         | 10.0 (4.3-23.0)  | 18.5 (7.5-45.7) | 20.7 (9.7-43.9)  |
| Brush when getting up in the morning** | Yes n(%)        | 9 (17.6)  | 53 (62.4)        | 55 (54.5)       | 108 (48.0)       |
|                                        | No n(%)         | 42 (82.4) | 32 (37.6)        | 46 (45.5)       | 117 (52.0)       |
|                                        | OR (95 % CI)**  | 1         | 7.7 (3.3-17.9)   | 5.5 (2.4-12.6)  | 4.3 (2.0-9.2)    |
|                                        | ORa (95 % CI)** | 1         | 7.8 (3.3-18.2)   | 5.8 (2.5-13.3)  | 4.3 (2.0-9.2)    |
| Brush after every main meal**          | Yes n(%)        | 6 (11.8)  | 37 (44.6)        | 51 (51.0)       | 102 (45.3)       |
|                                        | No n(%)         | 45 (88.2) | 46 (55.4)        | 49 (49.0)       | 123 (54.7)       |
|                                        | OR (95 % CI)**  | 1         | 6.0 (2.3-15.6)   | 7.8 (3.0-19.9)  | 6.2 (2.5-15.1)   |
|                                        | ORa (95 % CI)** | 1         | 6.3 (2.4-16.4)   | 7.6 (2.9-19.6)  | 6.2 (2.5-15.1)   |
| Wash before going to bed at night**    | Yes n(%)        | 13 (25.5) | 64 (77.1)        | 86 (85.1)       | 191 (85.7)       |
|                                        | No n(%)         | 38 (74.5) | 19 (22.9)        | 15 (14.9)       | 32 (14.3)        |
|                                        | OR (95 % CI)**  | 1         | 9.8 (4.3-22.1)   | 16.7 (7.2-38.6) | 17.4 (8.3-36.2)  |
|                                        | ORa (95 % CI)** | 1         | 12.2 (5.1-28.8)  | 23.8 (9.6-58.4) | 23.0 (10.4-50.9) |
| Use toothbrush**                       | Yes n(%)        | 41 (80.4) | 84 (98.8)        | 102 (100.0)     | 223 (99.6)       |
|                                        | No/unknown n(%) | 10 (19.6) | 1 (1.2)          | 0 (0.0)         | 1 (0.4)          |
|                                        | OR (95 % CI)**  | 1         | 20.4 (2.5-165.5) | <sup>a</sup>    | 54.3 (6.7-436.4) |
|                                        | ORa (95 % CI)** | 1         | 20.0 (2.4-161.6) | <sup>a</sup>    | 54.3 (6.7-436.4) |
| Use toothpaste**                       | Yes n(%)        | 40 (78.4) | 84 (98.8)        | 100 (98.0)      | 222 (99.1)       |
|                                        | No/unknown n(%) | 11 (21.6) | 1 (1.2)          | 2 (2.0)         | 2 (0.9)          |
|                                        | OR (95 % CI)**  | 1         | 23.1 (2.8-185.1) | 13.7 (2.9-64.8) | 30.5 (6.5-142.9) |
|                                        | ORa (95 % CI)** | 1         | 22.5 (2.8-180.8) | 13.2 (2.7-62.2) | 30.5 (6.5-142.9) |
| Use mouthwash                          | Yes n(%)        | 9 (17.6)  | 31 (36.5)        | 45 (44.6)       | 81 (36.5)        |
|                                        | No/unknown n(%) | 42 (82.4) | 54 (63.5)        | 56 (55.4)       | 141 (63.5)       |
|                                        | OR (95 % CI)*   | 1         | 2.6 (1.1-6.2)    | 3.7 (1.6-8.5)   | 2.6 (1.2-5.7)    |
|                                        | ORa (95 % CI)** | 1         | 3.7 (1.5-9.0)    | 5.0 (2.1-11.9)  | 3.6 (1.6-8.1)    |
| Use dental floss*                      | Yes n(%)        | 3 (5.9)   | 17 (20.0)        | 30 (29.4)       | 45 (20.4)        |
|                                        | No/unknown n(%) | 48 (94.1) | 68 (80.0)        | 72 (70.6)       | 176 (79.6)       |
|                                        | OR (95 % CI)*   | 1         | 4.0 (1.1-14.4)   | 6.6 (1.9-23.0)  | 4.0 (1.2-13.7)   |
|                                        | ORa (95 % CI)*  | 1         | 4.1 (1.1-14.8)   | 6.7 (1.9-23.3)  | 4.0 (1.2-13.7)   |
| Use toothpick**                        | No/unknown n(%) | 32 (62.7) | 72 (84.7)        | 79 (77.5)       | 208 (93.7)       |
|                                        | Yes n(%)        | 19 (37.3) | 13 (15.3)        | 23 (22.5)       | 14 (6.3)         |
|                                        | OR (95 % CI)**  | 1         | 3.2 (1.4-7.4)    | 2.0 (0.9-4.2)   | 8.8 (4.0-19.3)   |
|                                        | ORa (95 % CI)** | 1         | 3.2 (1.4-7.4)    | 2.2 (1.0-4.6)   | 9.4 (4.2-20.8)   |
| Type of toothbrush**                   | Electrical n(%) | 3 (5.9)   | 33 (38.8)        | 42 (41.2)       | 93 (41.7)        |
|                                        | Manual n(%)     | 48 (94.1) | 52 (61.2)        | 60 (58.8)       | 130 (58.3)       |
|                                        | OR (95 % CI)**  | 1         | 10.1 (2.9-35.2)  | 11.2 (3.2-38.3) | 11.4 (3.4-37.8)  |
|                                        | ORa (95 % CI)** | 1         | 10.5 (3.0-36.7)  | 11.0 (3.2-37.9) | 11.4 (3.4-37.8)  |
| Share toothbrush with others**         | Yes n(%)        | 9 (17.6)  | 0 (0.0)          | 2 (2.0)         | 2 (0.9)          |
|                                        | No n(%)         | 42 (82.4) | 81 (100.0)       | 97 (98.0)       | 221 (99.1)       |
|                                        | OR (95 % CI)**  | 1         | <sup>a</sup>     | 10.3 (2.1-50.1) | 23.6 (4.9-113.5) |
|                                        | ORa (95 % CI)** | 1         | <sup>a</sup>     | 9.9 (2.0-48.1)  | 23.6 (4.9-113.5) |
| Tooth brushing duration**              | 1-3 min n(%)    | 17 (33.3) | 60 (70.6)        | 68 (66.7)       | 152 (67.6)       |
|                                        | < 1 min n(%)    | 34 (66.7) | 25 (29.4)        | 34 (33.3)       | 73 (32.4)        |
|                                        | OR (95 % CI)**  | 1         | 4.8 (2.2-10.1)   | 4.0 (1.9-8.1)   | 4.1 (2.1-7.9)    |

|  |                 |   |                |                |                |
|--|-----------------|---|----------------|----------------|----------------|
|  | ORa (95 % CI)** | 1 | 6.6 (3.0-14.6) | 5.0 (2.3-10.6) | 5.3 (2.7-10.5) |
|--|-----------------|---|----------------|----------------|----------------|

216 CRC: children in residential care; CLF: children living on a family; OR: Odds Ratio; ORa: Odds Ratio adjusted for age  
 217 and sex; <sup>a</sup> OR calculation not applicable

218 \*p<0.01; \*\*p<0.001

219

## 220 **Personal hygiene practice learning and social rejection**

221 The family (father, mother, or other family member) was most frequently described  
 222 by all groups of children as having the greatest influence on their personal hygiene learning,  
 223 although this affirmation was made by a significantly lower percentage of CRCs (72.5 %, 37)  
 224 than of CLFs. In second place as learning agents, CLFs selected healthcare professionals, while  
 225 CRCs selected teachers, radio, television, internet, and self-learning (Table 5).

226 A significantly higher proportion of CRCs (41.1 %) had experienced social rejection  
 227 for being dirty in comparison to the CLFs (9.5% of those with family incomes < 1.000€ and  
 228 around 4% of those with higher family incomes). Very similar differences were observed in  
 229 the experience of rejection for smelling bad, although the percentages were slightly higher in  
 230 all groups, reaching almost 50% in CRCs and between 8.9 and 10.7% in CLFs. The only  
 231 statistically significant difference in motivations for personal hygiene activities was in the  
 232 option “to not be rejected by friends”, which was selected by 90% of CRCs *versus* 58% of  
 233 CLFs from families with incomes < 1,000€ and 36% of those from families with higher  
 234 incomes.

235 **Table 5. Comparison of socio-educational variables between children in residential care**  
 236 **and those living with their family according to its monthly income (N=455)**

| Socio-educational variables |                            |                                      | CRC<br>n=51 | CFL Income<br>≤1,000€<br>n=82 | CFL Income<br>1,001€-2,000€<br>n=97 | CFL Income<br>>2,000€<br>n=225 |
|-----------------------------|----------------------------|--------------------------------------|-------------|-------------------------------|-------------------------------------|--------------------------------|
|                             | Influences on body hygiene | Father, mother, or other relatives** | Yes n(%)    | 37(72.5)                      | 79(92.9)                            | 94(93.1)                       |
| No n(%)                     |                            |                                      | 14(27.5)    | 6(7.1)                        | 7(6.9)                              | 21(9.3)                        |
| Friends                     |                            | Yes n(%)                             | 2(3.9)      | 2(2.4)                        | 1(1.0)                              | 2(0.9)                         |
|                             |                            | No n(%)                              | 49(96.1)    | 81(97.6)                      | 98(99.0)                            | 222(99.1)                      |
| Neighbors                   |                            | Yes n(%)                             | 2(3.9)      | 3(3.6)                        | 0(0.0)                              | 2(0.9)                         |

|                     |                                 |                    |          |          |           |           |
|---------------------|---------------------------------|--------------------|----------|----------|-----------|-----------|
|                     |                                 | No n(%)            | 49(96.1) | 81(96.4) | 99(100.0) | 222(99.1) |
|                     | Radio, television, Internet*    | Yes n(%)           | 7(13.7)  | 7(8.3)   | 3(3.1)    | 10(4.5)   |
|                     |                                 | No n(%)            | 44(86.3) | 77(91.7) | 95(96.9)  | 214(95.5) |
|                     | Teachers                        | Yes n(%)           | 13(25.5) | 9(10.7)  | 12(12.2)  | 33(14.7)  |
|                     |                                 | No n(%)            | 38(74.5) | 75(89.3) | 86(87.8)  | 191(85.3) |
|                     | Nurses<br>Physicians            | Yes n(%)           | 13(25.5) | 32(38.1) | 33(33.0)  | 84(37.5)  |
|                     |                                 | No n(%)            | 38(74.5) | 52(61.9) | 67(67.0)  | 140(62.5) |
|                     | Self-learning                   | Yes n(%)           | 11(21.6) | 9(11.1)  | 11(11.1)  | 22(9.8)   |
|                     |                                 | No n(%)            | 40(78.4) | 72(88.9) | 88(88.9)  | 202(90.2) |
|                     | Unknown                         | Yes n(%)           | 1(2.0)   | 5(6.8)   | 2(2.2)    | 6(2.7)    |
|                     |                                 | No n(%)            | 50(98.0) | 68(93.2) | 87(97.8)  | 216(97.3) |
| Social rejection    | Rejected for being dirty**      | Never n(%)         | 30(58.8) | 76(90.5) | 98(96.1)  | 214(95.5) |
|                     |                                 | Occasionally n(%)  | 4(7.8)   | 7(8.3)   | 4(3.9)    | 10(4.5)   |
|                     |                                 | Several times n(%) | 17(33.3) | 1(1.2)   | 0(0.0)    | 0(0.0)    |
|                     | Rejected for smelling bad**     | Never n(%)         | 26(51.0) | 75(89.3) | 93(91.2)  | 204(91.1) |
|                     |                                 | Occasionally n(%)  | 7(13.7)  | 8(9.5)   | 8(7.8)    | 19(8.5)   |
|                     |                                 | Several times n(%) | 18(35.3) | 1(1.2)   | 1(1.0)    | 1(0.4)    |
| Reasons for hygiene | To be healthy                   | Yes n(%)           | 46(90.2) | 77(90.6) | 87(87.0)  | 200(89.3) |
|                     |                                 | No n(%)            | 5(9.8)   | 8(9.4)   | 13(13.0)  | 24(10.7)  |
|                     | To not smell bad                | Yes n(%)           | 49(96.1) | 78(91.8) | 89(87.3)  | 208(93.3) |
|                     |                                 | No n(%)            | 2(3.9)   | 7(8.2)   | 13(12.7)  | 15(6.7)   |
|                     | To not be rejected by friends** | Yes n(%)           | 46(90.2) | 49(58.3) | 36(36.0)  | 81(36.3)  |
|                     |                                 | No n(%)            | 5(9.8)   | 35(41.7) | 64(64.0)  | 142(63.7) |
|                     | To not be punished at home      | Yes n(%)           | 17(33.3) | 24(28.2) | 24(24.0)  | 59(26.5)  |
|                     |                                 | No n(%)            | 34(66.7) | 61(71.8) | 76(76.0)  | 164(73.5) |
|                     | To feel good                    | Yes n(%)           | 49(96.1) | 81(95.3) | 96(95.0)  | 211(94.2) |
|                     |                                 | No n(%)            | 2(3.9)   | 4(4.7)   | 5(5.0)    | 13(5.8)   |

237 CRC: children in residential care; CFL: children living in a family

238 \*p<0.05; \*\*p<0.001

239

## 240 Discussion

241 There has been little research in developed countries on SDHs related to family and  
 242 personal hygiene in childhood, and this study therefore contributes important empirical data.  
 243 The main finding was a clear relationship between the personal hygiene of the children and  
 244 their family settings.

245 In this study, CLFs were compared with CRCs whose situation of vulnerability was  
 246 sufficiently extreme to warrant removal from their families [23]. The parents/guardians of the  
 247 CRCs exhibit the main axes of inequality [1], being characterized by a low schooling level,  
 248 low qualifications, unemployment or only casual unskilled employment, and an income <

249 1,000€, with 70% having  $\geq 3$  children. Among the CRCs, 78.4% were born in Spain, although  
250 around two out of five of their parents were immigrants, and almost one out of three children  
251 did not go to school every day.

252 In comparison to the CLFs, the CRCs had poorer hygiene habits in all dimensions  
253 studied, were less likely to consider their families as the most influential agent in learning  
254 hygiene habits, and were more likely to experience social rejection due to their hygiene and to  
255 be motivated by this rejection to carry out personal hygiene activities. These findings question  
256 whether vulnerable families are adequately fulfilling their functions of protection, healthcare,  
257 and socialization [22,24].

258 The lower frequency of key personal hygiene practices (body, hair hand washing and  
259 tooth brushing) in the children from vulnerable families is consistent with reports that implicate  
260 the family structure and low parental educational and socioeconomic level in poor health,  
261 hygiene [25], and oral hygiene [26] behaviors in children. A strong relationship has been  
262 reported between low level of healthy habits and worse children's health as perceived by their  
263 mothers (OR=0.48 95% CI=0.42-0.56) [25]. Hence, the detection of signs of poor personal  
264 hygiene practices in children may help professionals to anticipate situations of ill health.

265 As previously observed by [27], an association was found between lower family  
266 income and worse hygiene practices, especially dental hygiene habits, with less frequent daily  
267 tooth brushing, tooth brushing before bedtime, and visits to the dentist. Despite the offer of free  
268 oral healthcare, visits to the dentist during the previous year were between 10- and 20.7-fold  
269 less frequent for CRCs than for CLFs. Researchers have concluded that families with lesser  
270 resources have a worse relationship with healthcare systems [28,29], which they engage with  
271 to a lesser extent, in part due to the lack of recognition of health problems [30].

272 The relationship between the physical environment in which children develop and  
273 healthy behaviors has also been demonstrated [3–5,31]. In the present study, children of

274 vulnerable families were less likely to use a toothbrush (especially an electrical device), hand-  
275 washing soap, shower gel, or toothpaste, while one in four of them used a washbowl and wet  
276 towel or sponge for body washing, reflecting the lack of opportunity to take a bath or shower.

277 Surprisingly, hand washing was not an established routine in the children, regardless  
278 of their family or institutional setting, possibly because it was carried out without the  
279 supervision of parents, despite being recommended as a family activity [32]. There was a  
280 higher frequency of hand washing after defecation in both CRCs and CLFs, although it  
281 continued to be low in the former, similar to the findings of a study in 11 developing countries  
282 [33]. This practice requires special attention, given that education in hand washing has been  
283 reported to reduce cases of diarrhea by 31% and cases of respiratory diseases by 21% [7,34].

284 Besides the biological implications of our findings, they are also relevant from a social  
285 standpoint, confirming the value of the family as a key factor in the acquisition of healthy habits  
286 [35]. Almost all CLFs and three-quarters of CRCs considered their families to be the main  
287 agents for learning hygiene practices, with a role also being attributed by CLFs to healthcare  
288 professionals and by CRCs to teachers, self-learning, and the mass media, which may reflect  
289 the worse relationship of poorer families with healthcare systems [28,29]. These findings  
290 suggest the need for educators and healthcare professionals to work together in the design and  
291 implementation of strategies to improve the hygiene habits of children from vulnerable  
292 families.

293 Weaknesses in the socialization function of the family were also revealed by the  
294 CRCs, who were more likely to be rejected for being dirty or smelling bad and to be motivated  
295 in their personal hygiene activities by the need to avoid this rejection. Hygiene behaviors play  
296 an important role in the impression that we make on others and as a display of respect for social  
297 norms [12], facilitating the integration and socialization of children among their peers. There  
298 is a relationship among family vulnerability, diseases associated with poor hygiene (e.g., caries



299 and pediculosis), school problems, and marginalization [17,36,37]. The long-term social  
300 effects of this situation are unclear; however, it appears likely to perpetuate the inequality and  
301 vulnerability of these children, with negative consequences for their health in adulthood [38].

302 According to the Model of Health Promotion of the Family [35], the values, targets,  
303 and needs of families mediate between their health practices and socioeconomic status. Hence,  
304 despite the limited influence of nursing professionals on the SDHs affecting families, they may  
305 be able to intervene in these mediators to improve health and hygiene practices. Family  
306 interventions have achieved improvements in the acquisition of healthy lifestyles related to  
307 physical activity and sport [39] and might therefore have a similar impact on personal hygiene  
308 habits.

## 309 **Limitations**

310 This study contains certain limitations. The sample size of children from vulnerable  
311 families was reduced due to difficulties in gaining access to this relatively small population,  
312 although it proved possible to obtain significant differences with the children living at home.  
313 There may have been a “volunteer” bias, given the response rate of only 60% for the CLFs,  
314 and the study design means that causality relationships could not be established. Finally, the  
315 lack of published data on this issue, especially in developed countries, limited the discussion  
316 of our findings.

## 317 **Conclusions**

318 Our study provides new evidence on the relationship among SDHs, family, and the  
319 personal hygiene practices of children. Our findings raise questions about the adequate  
320 fulfillment by vulnerable families of their protection, healthcare, and socialization functions.  
321 The results confirm that the family, understood as a complex system that acts on the health  
322 behaviors of the individuals that form it, affects the personal hygiene practices of children.  
323 Thus, deficient hygiene habits were observed in the offspring of families affected by the main

324 features of social inequality, who were more likely to perceive social rejection for this reason  
325 and less likely to consider their family as the greatest influence on their personal hygiene  
326 practices.

327         These findings indicate that action against social inequality can have a potential  
328 impact on biological mechanisms that affect health. Although this inequality cannot be resolved  
329 within the family setting, it can be ameliorated by promoting family practices designed to  
330 improve personal hygiene habits.

## 331         **Acknowledgements**

332         The authors are grateful to all of the children, families, schools and reception centers  
333 and their staff, and to the General Directorate of Social Policy of Murcia Autonomous  
334 Community.

## 335         **References**

- 336 1. Solar O, Irwin A. A Conceptual Framework for action on the Social Determinants of  
337 Health. Social Determinants of Health Discussion Paper 2. Geneva, Switzerland:  
338 World Health Organization; 2010.
- 339 2. U.S. Department of Health and Human Services TSAC on NHP and DPO for 2020.  
340 Phase I report: Recommendations for the framework and format of healthy people  
341 2020. 2008.
- 342 3. Turney K, Lee H MN. The social determinants of child health. Soc Sci Med.  
343 Pergamon; 2013;95: 1–5. doi:10.1016/J.SOCSCIMED.2013.07.015
- 344 4. United Nations International Children’s Emergency Fund. An overview of child well-  
345 being in rich countries A comprehensive assessment of the lives and well-being of  
346 children and adolescents in the economically advanced nations Child poverty in  
347 perspective [Internet]. Florence: UNICEF Innocenti Research Centre; 2007. Available:

- 348 [https://www.unicef-irc.org/publications/pdf/rc7\\_eng.pdf](https://www.unicef-irc.org/publications/pdf/rc7_eng.pdf)
- 349 5. Wen M. Family Structure and Children's Health and Behavior. J Fam Issues. SAGE  
350 PublicationsSage CA: Los Angeles, CA; 2008;29: 1492–1519.  
351 doi:10.1177/0192513X08320188
- 352 6. Greene VW. Personal hygiene and life expectancy improvements since 1850: Historic  
353 and epidemiologic associations. Am J Infect Control. Mosby; 2001;29: 203–206.  
354 doi:10.1067/MIC.2001.115686
- 355 7. Aiello AE, Coulborn RM, Perez V, Larson EL. Effect of hand hygiene on infectious  
356 disease risk in the community setting: a meta-analysis. Am J Public Health. American  
357 Public Health Association; 2008;98: 1372–1381. doi:10.2105/AJPH.2007.124610
- 358 8. Luby SP, Agboatwalla M, Feikin DR, Painter J, Billhimer W, Altaf A, et al. Effect of  
359 handwashing on child health: a randomised controlled trial. Lancet. Elsevier;  
360 2005;366: 225–233. doi:10.1016/S0140-6736(05)66912-7
- 361 9. World Health Organization, (UNICEF) TUNCF. The Integrated Global Action Plan  
362 for the Prevention and Control of Pneumonia and Diarrhoea (GAPPD) The integrated  
363 Global Action Plan for Pneumonia and Diarrhoea (GAPPD) WHO Library  
364 Cataloguing-in-Publication Data End preventable deaths: Global Action Pla. Geneva,  
365 Switzerland: World Health Organization and UNICEF; 2013.
- 366 10. Hallas D, Shelley D. Role of Pediatric Nurse Practitioners in Oral Health Care. Acad  
367 Pediatr. 2009;9: 462–466. doi:10.1016/j.acap.2009.09.009
- 368 11. Moshki M, Zamani-Alavijeh F, Mojadam M. Efficacy of Peer Education for Adopting  
369 Preventive Behaviors against Head Lice Infestation in Female Elementary School  
370 Students: A Randomised Controlled Trial. PLoS One. Public Library of Science;  
371 2017;12: e0169361. doi:10.1371/journal.pone.0169361
- 372 12. van der Geest S. Hygiene and sanitation: medical, social and psychological concerns.

- 373 CMAJ. Canadian Medical Association; 2015;187: 1313. doi:10.1503/cmaj.150588
- 374 13. Bradley RH, Corwyn RF. Socioeconomic Status and Child Development. *Annu Rev*  
375 *Psychol. Annual Reviews* 4139 El Camino Way, P.O. Box 10139, Palo Alto, CA  
376 94303-0139, USA ; 2002;53: 371–399. doi:10.1146/annurev.psych.53.100901.135233
- 377 14. Marmot M. Social determinants of health inequalities. *Lancet*. 2005;365: 1099–1104.
- 378 15. McNeill T. Family as a Social Determinant of Health: Implications for Governments  
379 and Institutions to Promote the Health and Well-Being of Families. *Healthc Q*.  
380 2010;14: 60–67. doi:10.12927/hcq.2010.21984
- 381 16. World Health Organization Regional Office for Europe. The WHO Regional Office for  
382 Europe [Internet]. 2016. Available:  
383 [http://www.euro.who.int/\\_\\_data/assets/pdf\\_file/0003/303438/HSBC-No.7-Growing-](http://www.euro.who.int/__data/assets/pdf_file/0003/303438/HSBC-No.7-Growing-up-unequal-Full-Report.pdf?ua=1)  
384 [up-unequal-Full-Report.pdf?ua=1](http://www.euro.who.int/__data/assets/pdf_file/0003/303438/HSBC-No.7-Growing-up-unequal-Full-Report.pdf?ua=1)
- 385 17. Sim S, Lee W-J, Yu J-R, Lee IY, Lee SH, Oh S-Y, et al. Risk factors associated with  
386 head louse infestation in Korea. *Korean J Parasitol. Korean Society for Parasitology*;  
387 2011;49: 95–8. doi:10.3347/kjp.2011.49.1.95
- 388 18. Marí-Klose P, Martínez Pérez A. Empobrecimiento en tiempos de crisis:  
389 vulnerabilidad y (des)protección social en un contexto de adversidad. *Panor Soc*.  
390 2015;22: 11–26.
- 391 19. Smalley LP, Kenney MK, Denboba D, Strickland B. Family Perceptions of Shared  
392 Decision-Making with Health Care Providers: Results of the National Survey of  
393 Children with Special Health Care Needs, 2009–2010. *Matern Child Health J. Springer*  
394 *US*; 2014;18: 1316–1327. doi:10.1007/s10995-013-1365-z
- 395 20. Sainero A, Del Valle JF, Bravo A. Detección de problemas de salud mental en un  
396 grupo especialmente vulnerable: niños y adolescentes en acogimiento residencial. *An*  
397 *Psicol*. 2015;31: 472. doi:10.6018/analesps.31.2.182051

- 398 21. Martín Cabrera E. Niños, niñas y adolescentes en acogimiento residencial. Un análisis  
399 en función del género. *Curriculum Rev Teoría, Investig y Práctica Educ* ISSN 1130-  
400 5371, N° 28, 2015, págs 88-102. 2015; 88–102.
- 401 22. Deatrck JA. Where Is “Family” in the Social Determinants of Health? Implications for  
402 Family Nursing Practice, Research, Education, and Policy. *J Fam Nurs*. 2017;23: 423–  
403 433. doi:10.1177/1074840717735287
- 404 23. Wilkinson, Richard G, Marmot, Michael, World Health Organization. Regional Office  
405 for Europe WC for UH (Europe) & IC for H and S. Social determinants of health : the  
406 solid facts. 2nd ed. Geneva, Switzerland: World Health Organization; 2003.
- 407 24. Kaakinen, J. R., Gedaly-Duff, V., Coehlo, D. P., Hanson SMH. Family health care  
408 nursing: Theory, practice, and research. Kaakinen, J. R., Gedaly-Duff, V., Coehlo, D.  
409 P., Hanson SMH, editor. Philadelphia, PA: F. A. Davis; 2010.
- 410 25. Lin Y-C, Wu JC-L, Chiou S-T, Chiang T. Healthy living practices in families and  
411 child health in Taiwan. *Int J Public Health*. Springer International Publishing; 2015;60:  
412 691–698. doi:10.1007/s00038-015-0701-z
- 413 26. Kumar S, Zimmer-Gembeck MJ, Kroon J, Lalloo R, Johnson NW. The role of parental  
414 rearing practices and family demographics on oral health-related quality of life in  
415 children. *Qual Life Res*. Springer International Publishing; 2017;26: 2229–2236.  
416 doi:10.1007/s11136-017-1568-7
- 417 27. Wagstaff A. Poverty and health sector inequalities. *Bull World Health Organ*. 2002;80:  
418 97–105. Available: <http://www.ncbi.nlm.nih.gov/pubmed/11953787>
- 419 28. Kenney MK, Denboba D, Strickland B, Newacheck PW. Assessing family-provider  
420 partnerships and satisfaction with care among US children with special health care  
421 needs. *Acad Pediatr*. United States; 2011;11: 144–151. doi:10.1016/j.acap.2010.08.001
- 422 29. Smalley LP, Kenney MK, Denboba D, Strickland B. Family perceptions of shared

- 423 decision-making with health care providers: results of the National Survey of Children  
424 With Special Health Care Needs, 2009-2010. *Matern Child Health J. United States*;  
425 2014;18: 1316–1327. doi:10.1007/s10995-013-1365-z
- 426 30. Hill Z, Kirkwood B, Edmond K. Family and community practices that promote child  
427 survival, growth and development: A review of the evidence [Internet]. 2004.  
428 Available:  
429 [https://coregroup.secure.nonprofitsoapbox.com/storage/documents/CCM/who\\_keyfam](https://coregroup.secure.nonprofitsoapbox.com/storage/documents/CCM/who_keyfamilypracticesevidence.pdf)  
430 [ilypracticesevidence.pdf](https://coregroup.secure.nonprofitsoapbox.com/storage/documents/CCM/who_keyfamilypracticesevidence.pdf)
- 431 31. Satcher D. Children’s Oral Health: The Time for Change is Now. *Acad Pediatr*.  
432 2009;9: 380–382. doi:10.1016/j.acap.2009.09.020
- 433 32. Center for Disease Control and Prevencion. Handwashing: A Family Activity  
434 [Internet]. 2012.
- 435 33. Curtis VA, Danquah LO, Aunger R V. Planned, motivated and habitual hygiene  
436 behaviour: an eleven country review. *Health Educ Res. Oxford University Press*;  
437 2009;24: 655–73. doi:10.1093/her/cyp002
- 438 34. Ejemot-Nwadiaro RI, Ehiri JE, Arikpo D, Meremikwu MM, Critchley JA. Hand  
439 washing promotion for preventing diarrhoea. *Cochrane Database Syst Rev. John Wiley*  
440 *& Sons, Ltd*; 2015; doi:10.1002/14651858.CD004265.pub3
- 441 35. Christensen P. The health-promoting family: a conceptual framework for future  
442 research. *Soc Sci Med. Pergamon*; 2004;59: 377–387.  
443 doi:10.1016/J.SOCSCIMED.2003.10.021
- 444 36. Sidoti E, Bonura F, Paolini G, Tringali G. A survey on knowledge and perceptions  
445 regarding head lice on a sample of teachers and students in primary schools of north  
446 and south of Italy. *J Prev Med Hyg. 2009*;50: 141-9; quiz 150–1.
- 447 37. Tinanoff N, Reisine S. Update on Early Childhood Caries Since the Surgeon General’s

- 448 Report. Acad Pediatr. NIH Public Access; 2009;9: 396–403.  
449 doi:10.1016/j.acap.2009.08.006
- 450 38. Ben-Shlomo Y, Kuh D. A life course approach to chronic disease epidemiology:  
451 conceptual models, empirical challenges and interdisciplinary perspectives. Int J  
452 Epidemiol. Oxford University Press; 2002;31: 285–293. doi:10.1093/ije/31.2.285
- 453 39. Kitzman-Ulrich H, Wilson DK, St George SM, Lawman H, Segal M, Fairchild A. The  
454 integration of a family systems approach for understanding youth obesity, physical  
455 activity, and dietary programs. Clin Child Fam Psychol Rev. NIH Public Access;  
456 2010;13: 231–53. doi:10.1007/s10567-010-0073-0  
457
